# Supplementary material
Source: Springer Nature journal article supplement (https://www.springermedizin.de/resource/supplementary/12911_2007_219_MOESM1_ESM.pdf/9527402)

Graphic 1: the assessment of all pictures made in between 2000 en 2002

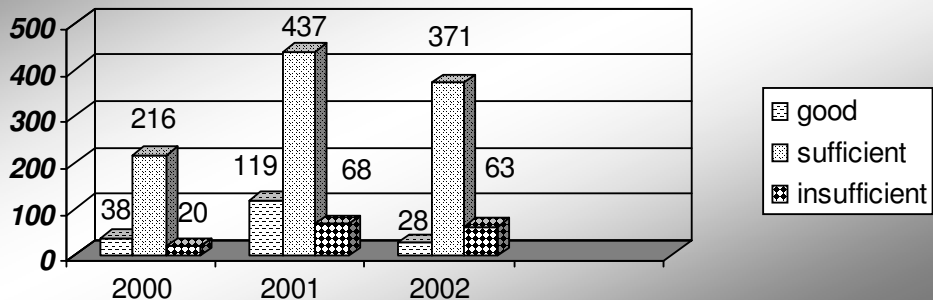

Graphic 2: the ophthalmologist's redefinition of the categories

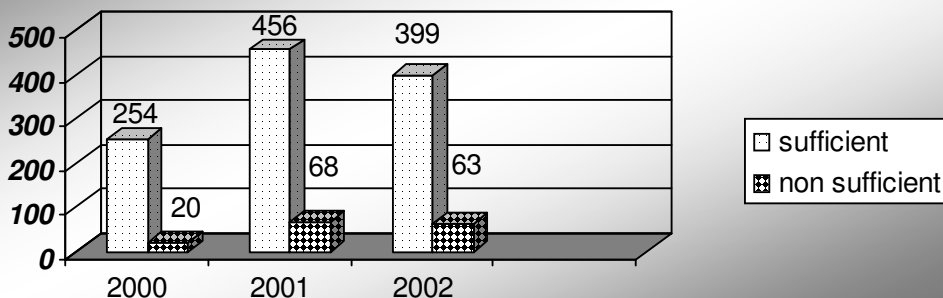

Graphic 3: the ophthalmologist's redefinition of the categories

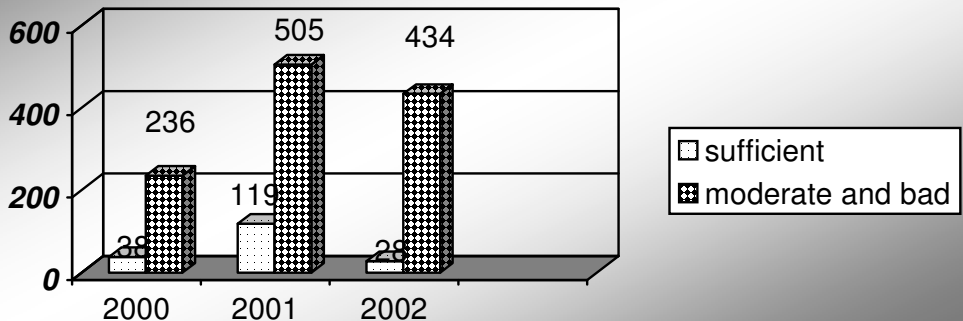

Supplement: MOESM1 [file 9527402]
